# Supplementary material for: Heart Rate Variability as an Indicator of Autonomic Nervous System Disturbance in Tetanus
Source: PubMed Central journal article supplement (PMC7008337; doi:10.4269/ajtmh.19-0720), 2019-12-12
Supplement: tpmd190720.SD1.pdf [file tpmd190720.SD1.pdf]

The following are supplemental materials and will be published online only

**Supplementary Table: Mixed effects model**

| <b>Feature</b>                                         | <b>Difference</b> | <b>95% Confidence intervals</b> | <b>p</b> |
|--------------------------------------------------------|-------------------|---------------------------------|----------|
| <b>Log<sub>2</sub> RMSSD (ms)</b>                      | -1.21             | -2.58; 0.16                     | 0.09     |
| <b>Log<sub>2</sub> SDNN (ms)</b>                       | -1.15             | -2.00; -0.31                    | 0.008    |
| <b>Log<sub>2</sub> Low Frequency (ms<sup>2</sup>)</b>  | -5.08             | -8.66; -1.49                    | 0.006    |
| <b>Log<sub>2</sub> High Frequency (ms<sup>2</sup>)</b> | -3.45             | -5.79; -1.11                    | 0.004    |
| <b>Log<sub>2</sub> Low Frequency normalized units</b>  | -1.68             | -3.28; -0.07                    | 0.004    |
| <b>Log<sub>2</sub> High Frequency normalized units</b> | -0.025            | -1.20; 1.15                     | 0.97     |
| <b>Log<sub>2</sub> Total Power (ms<sup>2</sup>)</b>    | -3.07             | -5.40; -0.75                    | 0.01     |
| <b>Log<sub>2</sub> Low:Frequency</b>                   | -1.66             | -3.99; 0.69                     | 0.17     |
